# Supplementary material for: Suppression of DC-SIGN and gH Reveals Complex, Subset-Specific Mechanisms for KSHV Entry in Primary B Lymphocytes
Source: MDPI journal article supplement (doi:10.3390/v13081512), 2021-07-31
Supplement: s1 [file s1]

A

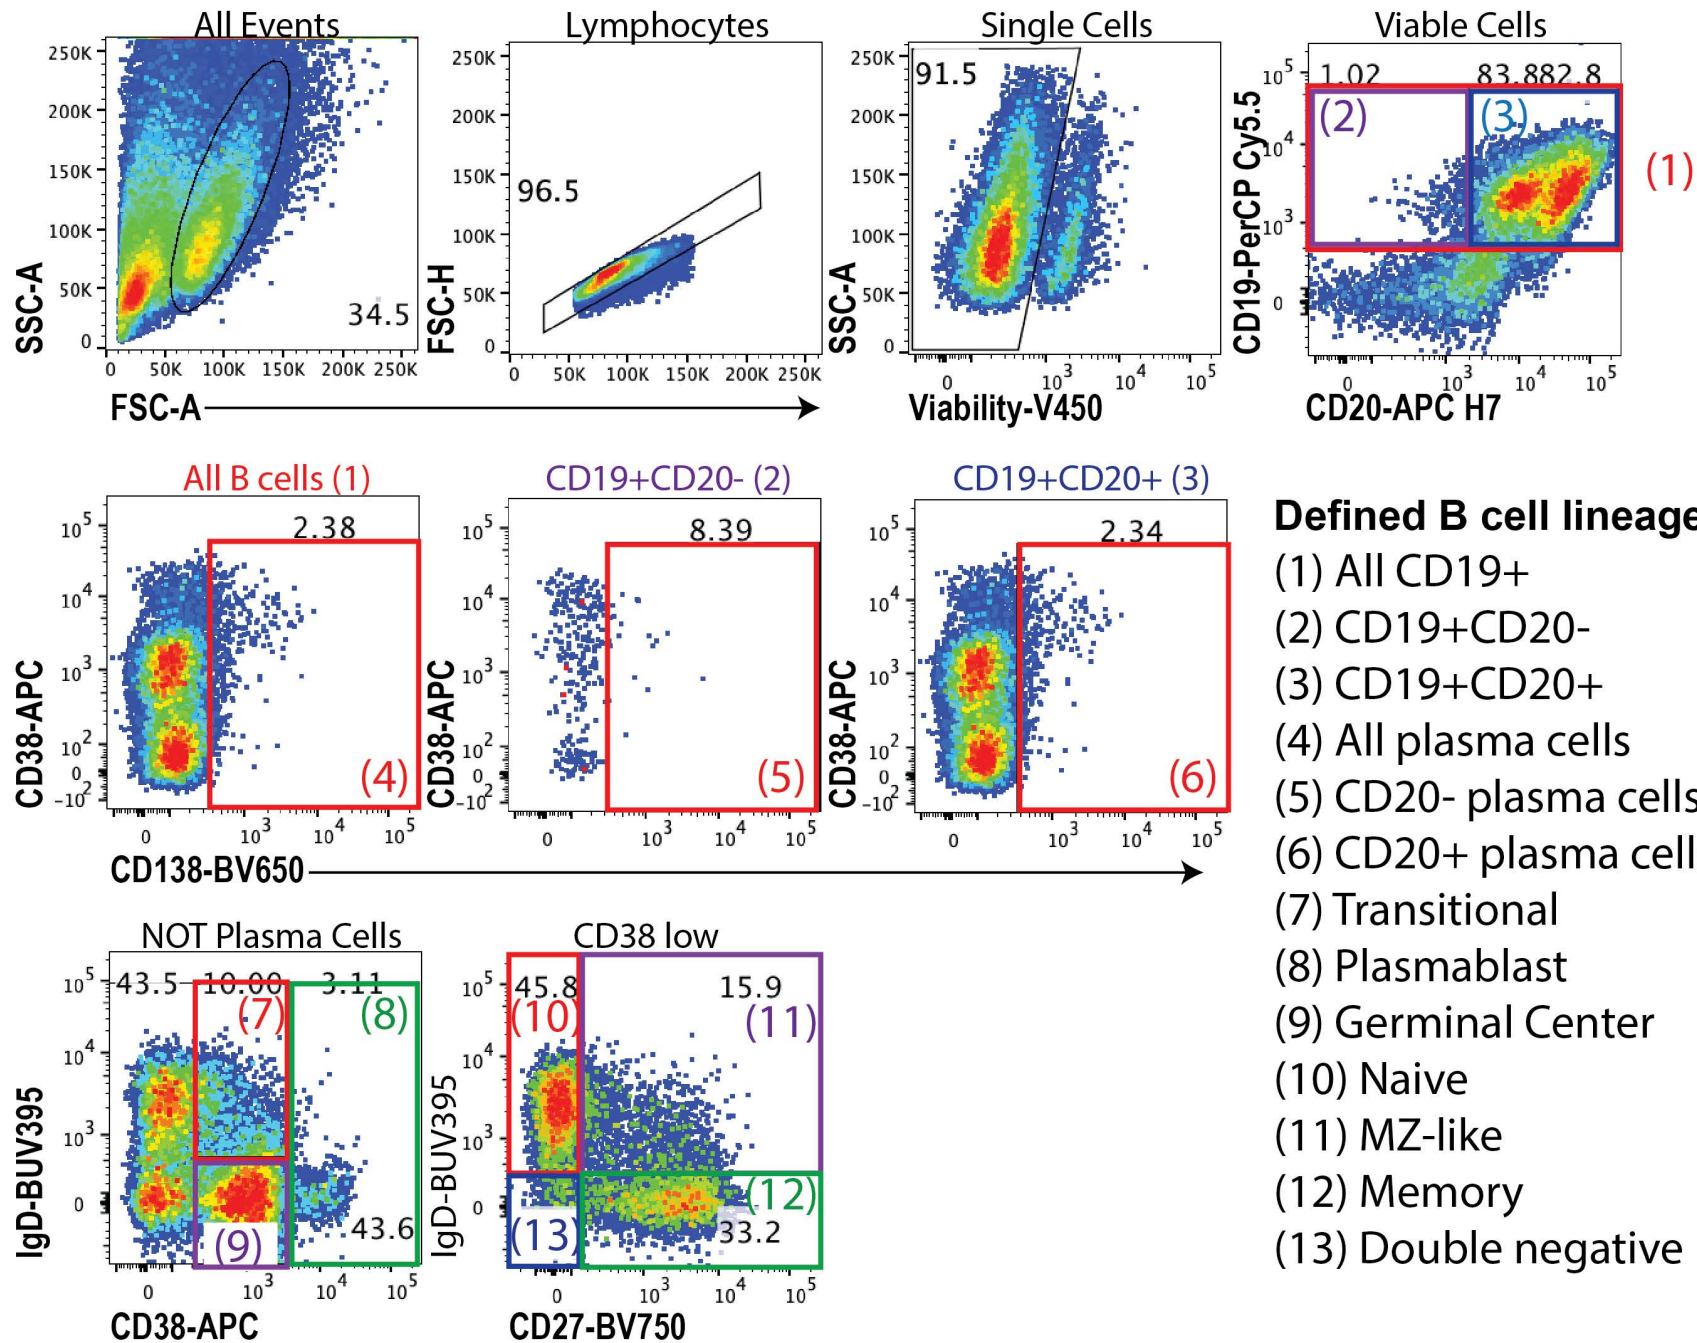

Supplemental Figure S1: Sample gating scheme for the B cell lineages in this study

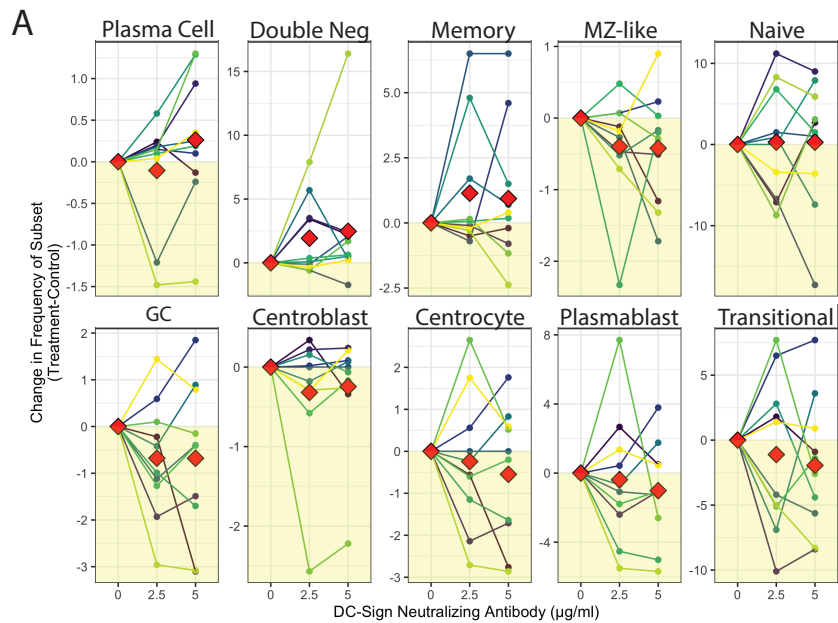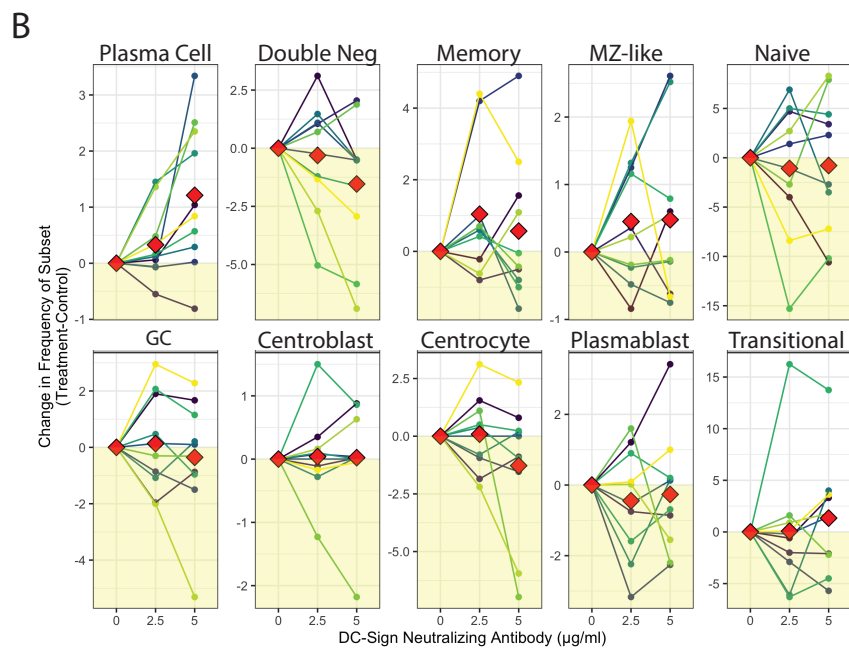

Supplemental Figure S2: Changes in lineage frequencies (Treatment-Control) with DC-SIGN neutralization at 3dpi for (A) Mock infected and (B) KSHV-WT infected cultures. Red diamonds indicate the mean of all tonsil samples for the specific lineage/condition.
